# Supplementary material
Source: MDPI journal article supplement (https://www.mdpi.com/2073-4352/13/5/837)
Supplement: s1 [file s1]

### Supplementary Information

**Table S1** Comparison of crystal parameters of compound **2** with the already reported compound

| Crystal Parametres                                     | <b>2</b>                                                                       | <b>CCDC 826011</b>                                                             |
|--------------------------------------------------------|--------------------------------------------------------------------------------|--------------------------------------------------------------------------------|
| Emprical formula                                       | C <sub>42</sub> H <sub>36</sub> Mn <sub>3</sub> N <sub>6</sub> O <sub>30</sub> | C <sub>42</sub> H <sub>36</sub> Mn <sub>3</sub> N <sub>6</sub> O <sub>30</sub> |
| Formula weight                                         | 1269.59                                                                        | 1269.59                                                                        |
| Temperature (K)                                        | 296(2)                                                                         | 293(2)                                                                         |
| Crystal system                                         | Trigonal                                                                       | Trigonal                                                                       |
| Space group                                            | <i>P</i> $\bar{3}$                                                             | <i>P</i> $\bar{3}$                                                             |
| <i>a</i> /Å                                            | 14.6618(8)                                                                     | 14.6673(3)                                                                     |
| <i>b</i> /Å                                            | 14.6618(8)                                                                     | 14.6673(3)                                                                     |
| <i>c</i> /Å                                            | 6.3551(4)                                                                      | 6.36430(1)                                                                     |
| $\alpha$ °                                             | 90                                                                             | 90                                                                             |
| $\beta$ °                                              | 90                                                                             | 90                                                                             |
| $\gamma$ °                                             | 120                                                                            | 120                                                                            |
| Volume (Å <sup>3</sup> )                               | 1183.12(1)                                                                     | 1185.72(4)                                                                     |
| Z                                                      | 1                                                                              | 1                                                                              |
| Calculated density (g/cm <sup>3</sup> )                | 1.782                                                                          | 1.778                                                                          |
| Absorption coefficient (mm <sup>-1</sup> )             | 0.901                                                                          | 0.899                                                                          |
| F(000)                                                 | 645                                                                            | 645                                                                            |
| Crystal size (mm <sup>3</sup> )                        | 0.31×0.22×0.12                                                                 | 0.20×0.10×0.10                                                                 |
| Index ranges                                           | -16≤ <i>h</i> ≤16,<br>-16≤ <i>k</i> ≤16,<br>-7≤ <i>l</i> ≤7                    | -18≤ <i>h</i> ≤19,<br>-19≤ <i>k</i> ≤19,<br>-8≤ <i>l</i> ≤8                    |
| Reflections collected                                  | 28974                                                                          | 1808                                                                           |
| Unique data( <i>R</i> <sub>int</sub> )                 | 1249                                                                           | 1564                                                                           |
| Refinement method                                      | Full-matrix least-squares on F <sup>2</sup>                                    | Full-matrix least-squares on F <sup>2</sup>                                    |
| Data / restraints / parameters                         | 1249/0/123                                                                     | 1808 / 2 / 135                                                                 |
| Goodness-of-fit on F <sup>2</sup>                      | 1.055                                                                          | 1.046                                                                          |
| Final R indices[ <i>I</i> >2σ ( <i>I</i> )]<br>R1/ wR2 | 0.0227/0.0574                                                                  | 0.0330/0.0840                                                                  |

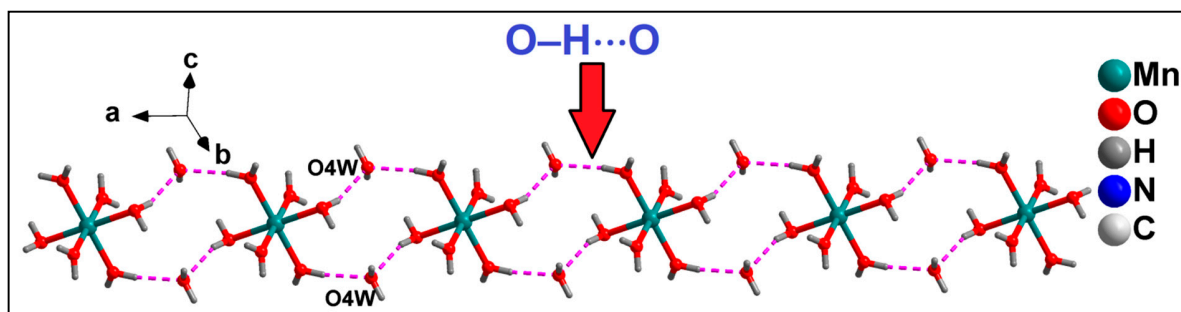

**Figure S1** Supramolecular 1D Chain of compound **1** assisted by the lattice water molecule.

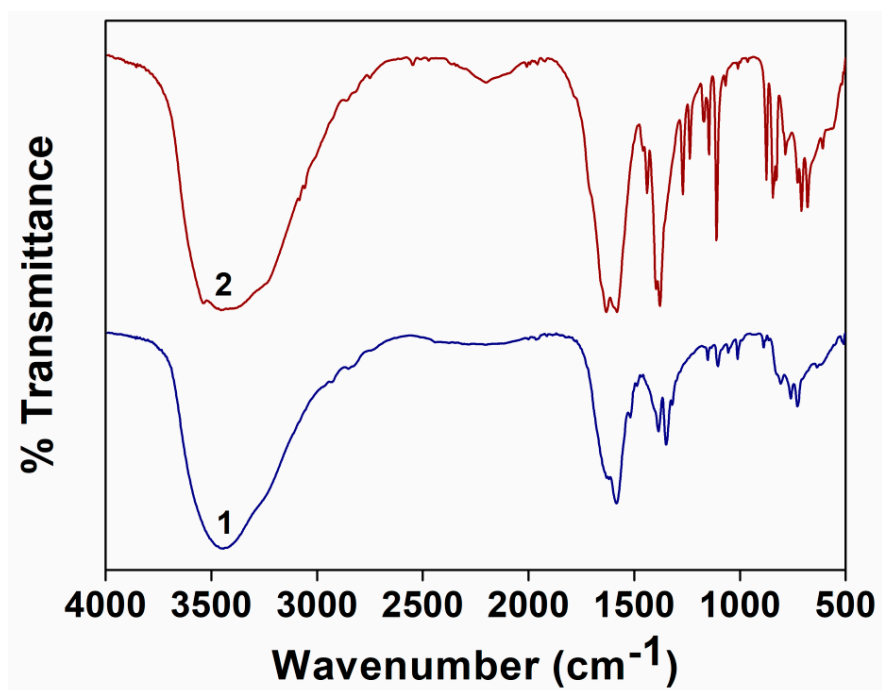

**Figure S2** FT-IR spectra of the compounds **1** and **2**.

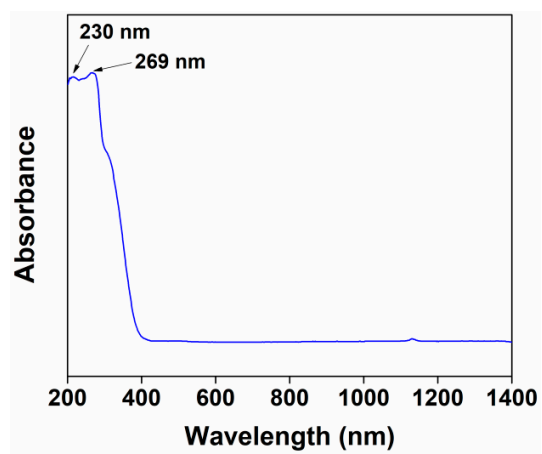

**Figure S3(a)** UV-Vis-NIR spectrum of **1**

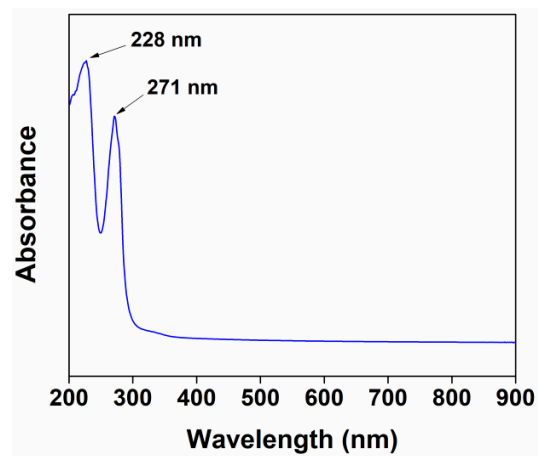

**(b)** UV-Vis spectrum of **1**.

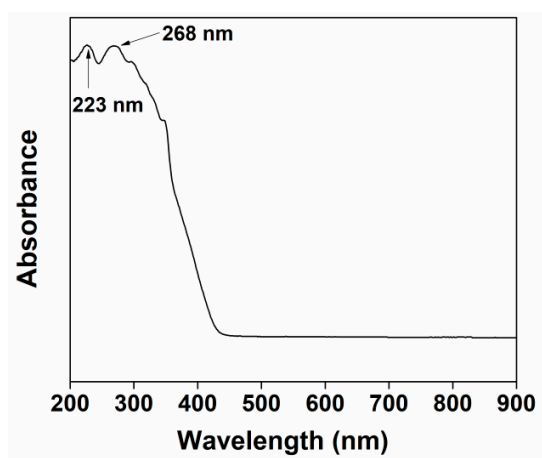

**Figure S4(a)** UV-Vis-NIR spectrum of **2**

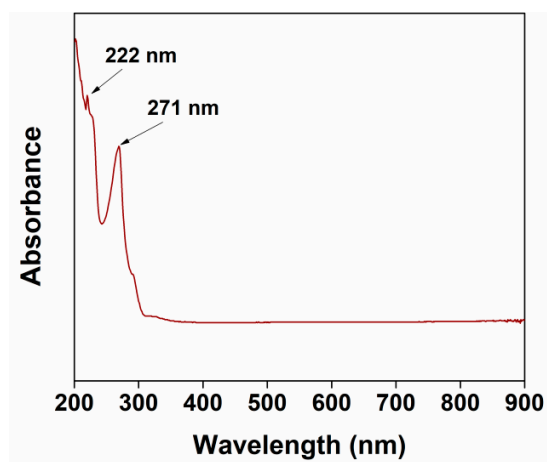

**(b)** UV-Vis spectrum of **2**.

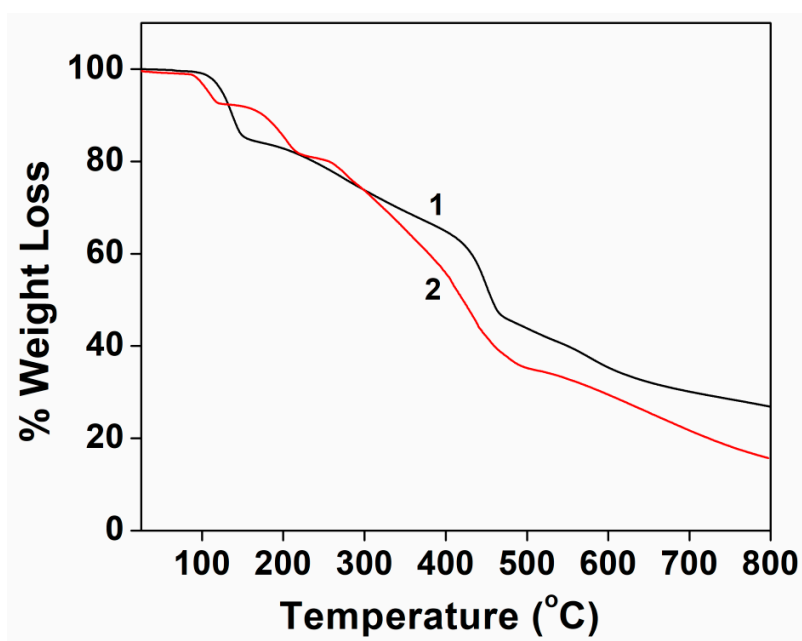

**Figure S5** Thermogravimetric curves of the compounds **1** and **2**.
